# Supplementary material for: Genetic landscape of a large cohort of Primary Ovarian Insufficiency: New genes and pathways and implications for personalized medicine
Source: PubMed Central journal article supplement — eBioMedicine. 2022 Sep 10;84:104246. doi: 10.1016/j.ebiom.2022.104246 (PMC9475279; doi:10.1016/j.ebiom.2022.104246), 2022-09-10
Supplement: mmc1.pdf [file mmc1.pdf]

## SUPPLEMENTAL APPENDIX

### Genetic landscape of a large cohort of Primary Ovarian Insufficiency. New genes/pathways and implication for personalized medicine

#### Supplemental Materials and Methods:

##### 1. Molecular genetics studies

###### a) *Whole exome sequencing*

Whole exome sequencing studies (WES) were performed on genomic DNA extracted from the peripheral blood of the proband and available affected and unaffected sisters and mothers. Library preparation, exome capture, sequencing, and data processing were performed by IntegraGen SA (Evry, France) according to their in-house procedures. Data analysis was performed as described in our previous studies [1–4]. In brief, exon enrichment was performed on 600 ng of DNA, using the Agilent SureSelect Human All Exons kit version CRE (Agilent Technologies, Santa Clara, USA). Exon-enriched libraries were subjected to 75 bp paired-end sequencing on a HiSeq2500, according to the manufacturer's protocol. Read alignment to the human reference genome (GRCh38) and variant calling were performed using the Illumina pipeline (CASAVA 1.8.2). Variant annotation was performed using Ensembl's Variant Effect Predictor. The variants were filtered using SIRIUS, an IntegraGen in-house pipeline platform.

Filtration according to the mode of inheritance is a powerful method. Therefore, the exomes of affected patients were compared to the exomes of selected and available affected and non-affected members of the family. The exome analysis was performed as follows: In the presence of known or suspected consanguinity, we focused on all rare homozygous variants identified in the patient's exome. In fact, each exome contained approximately 10–20 rare homozygous variants. When parents' exomes were available, we confirmed the presence of the variant in the heterozygous state in one or both parents. The causal variant was identified using a combination

of *in silico* bioinformatic predictors and bibliographic research (regarding gene function, expression, animal model described, etc.). In the absence of inbreeding, we tested the hypothesis of a recessive mode of transmission but with two compound heterozygous pathogenic variants; these variants occur in the same gene, each of which is transmitted by one of the two parents. We therefore performed a comparative study of the patient's exome with that of the parents or her available relatives. Furthermore, we tested the dominant mode of transmission of a paternal gene variant—which had no effect on male fertility—transmitted to the proposita and affected sisters and absent in the unaffected sisters. Finally, and although rarely described in POI, we tested the *de novo* hypothesis (variant present only in the proposita and absent from WES of both parents when the latter were available).

*b) Targeted next generation sequencing*

A custom-made targeted NGS study, including all known genes involved in POI [5], was performed in proposita and available relatives. Libraries were prepared using an NEB Next DNA Library Prep Master Mix Set for Illumina (NEB Inc). Enrichment was performed on 500 ng of DNA using a Sure Select XT Reagent Kit (Agilent). Libraries were subjected to 75 bp paired-end sequencing on a MiSeq2500 according to the manufacturer's protocol. Data analysis was performed using an automated bioinformatics pipeline implemented with a local Galaxy instance at Bicêtre Hospital, France. In brief, alignment to the human reference genome 19 (GRCh37) was performed using BWA-MEM 0.7.10. Variant calling was performed using GATK 3.4-46, and single nucleotide variants were annotated using both Annovar 2015-06-17 and Snpeff 4.0. Variants detected were processed using the following bioinformatic filters: (i) variants with a read coverage under 5× and a Q score <20 were filtered out, and (ii) variations against ExAC databases were filtered using a minor allelic frequency (MAF) of 0.02. The short list of variants with an MAF <0.02 according to the ExAC database was then manually annotated using dbNSFP, an integrated database including a wide range of *in silico* predictors and all human polymorphism databases, notably gnomAD [6]. Variant classification according

to the ACMG-AMP 2015 guideline was performed using InterVar [7] (<https://wintervar.wglab.org/>) and Varsome [8] (<https://varsome.com/>).

c) NGS Studies in familial POI: In our cohort, 70 probanda belonging to 70 different families have been included. For 24 non-consanguineous patients, mainly of European origin (16 Europeans, 5 North Africans, 2 Africans and 1 Asian), no family member (parents, sisters, cousins) was available for exome studies. A targeted –NGS (T-NGS) was performed. For 46 other families either consanguineous or with available relatives, 13 were studied in our laboratory in 2017 before the implementation of our efficient in-house targeted NGS. We used WES first to study those families. The other 33 patients had T-NGS first after its development, followed by WES in the case T-NGS was negative.

#### c) Sanger Genomic Sequencing

Direct genomic Sanger sequencing was performed in the probanda and the available relatives to confirm the relevant pathogenic variant and to specify the inheritance.

### Supplemental References

1. Fouquet B, Pawlikowska P, Caburet S, Guigon C, Mäkinen M, Tanner L, et al. A homozygous FANCM mutation underlies a familial case of non-syndromic primary ovarian insufficiency. *Elife*. 2017;6.
2. Heddar A, Beckers D, Fouquet B, Roland D, Misrahi M. A novel phenotype combining primary ovarian insufficiency growth retardation and pilomatricomas with MCM8 mutation. *J Clin Endocrinol Metab*. 2020;
3. Caburet S, Heddar A, Dardillac E, Creux H, Lambert M, Messiaen S, et al. Homozygous hypomorphic BRCA2 variant in primary ovarian insufficiency without cancer or Fanconi anaemia trait. *J Med Genet*. 2020;
4. Heddar A, Dessen P, Flatters D, Misrahi M. Novel STAG3 mutations in a Caucasian family with primary ovarian insufficiency. *Mol Genet Genomics*. 2019;294:1527–34.
5. Huhtaniemi I, Hovatta O, La Marca A, Livera G, Monniaux D, Persani L, et al. Advances in the Molecular Pathophysiology, Genetics, and Treatment of Primary Ovarian Insufficiency. *Trends Endocrinol Metab*. 2018;29:400–19.

6. Liu X, Wu C, Li C, Boerwinkle E. dbNSFP v3.0: A One-Stop Database of Functional Predictions and Annotations for Human Nonsynonymous and Splice-Site SNVs. *Hum Mutat.* 2016;37:235–41.
7. Li Q, Wang K. InterVar: Clinical Interpretation of Genetic Variants by the 2015 ACMG-AMP Guidelines. *Am J Hum Genet.* 2017;100:267–80.
8. Kopanos C, Tsiolkas V, Kouris A, Chapple CE, Albarca Aguilera M, Meyer R, et al. VarSome: the human genomic variant search engine. *Bioinformatics.* 2019;35:1978–80.

## Supplemental Figures

**Fig.S1: Clinical characteristics of the patients in the cohort of POI.** **A.** Sporadic or familial cases. **B.** Menses; PA: Primary Amenorrhea, SA: Secondary Amenorrhea, SP: Spaniomenorrhea. **C.** Initial clinical presentation: isolated/non-syndromic (dark blue); syndromic with other extra-ovarian features (light blue). **D.** Ethnicity of the patients.

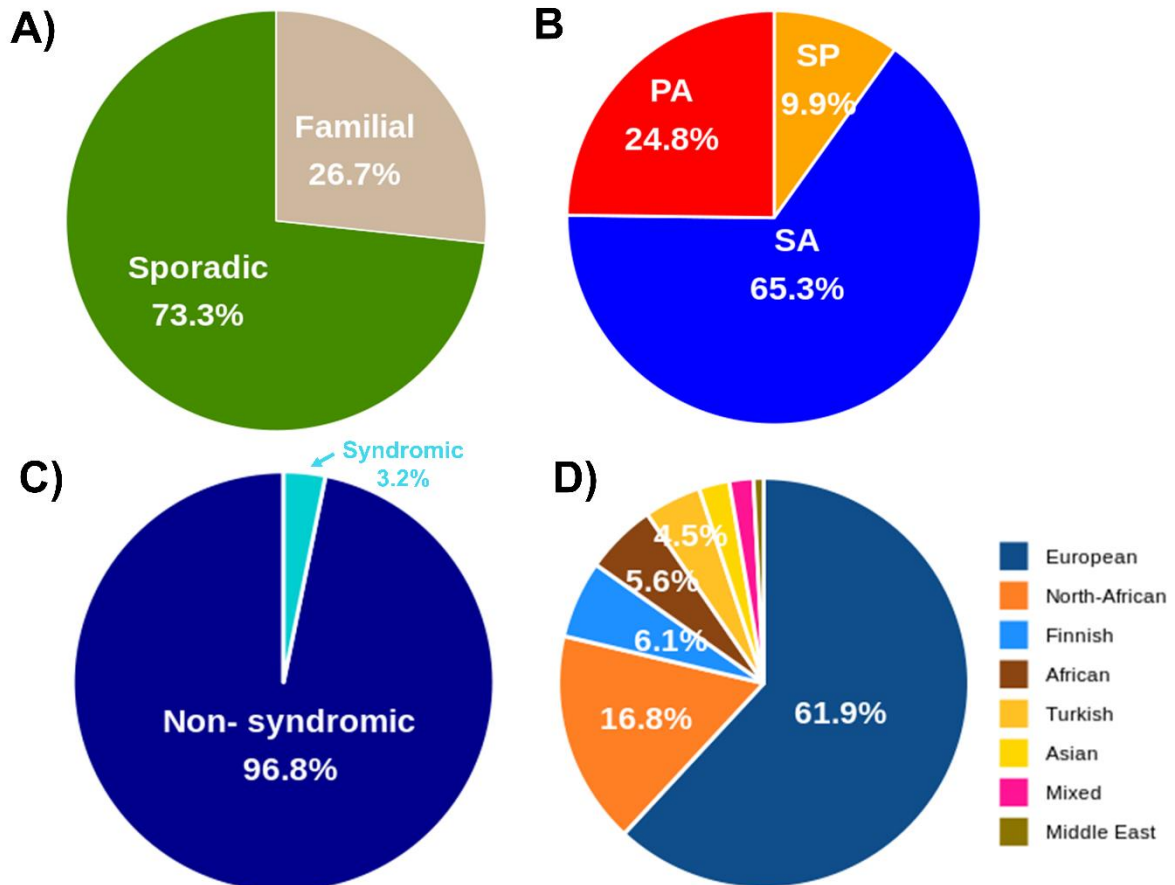

**Fig.S2: Most recurrent genes in the cohort.** Genes with variants in three patients or more are represented. Variants are classified according to ACMG criteria. Only Pathogenic and Likely pathogenic variants are considered for the genetic diagnosis as recommended by the ACMG.

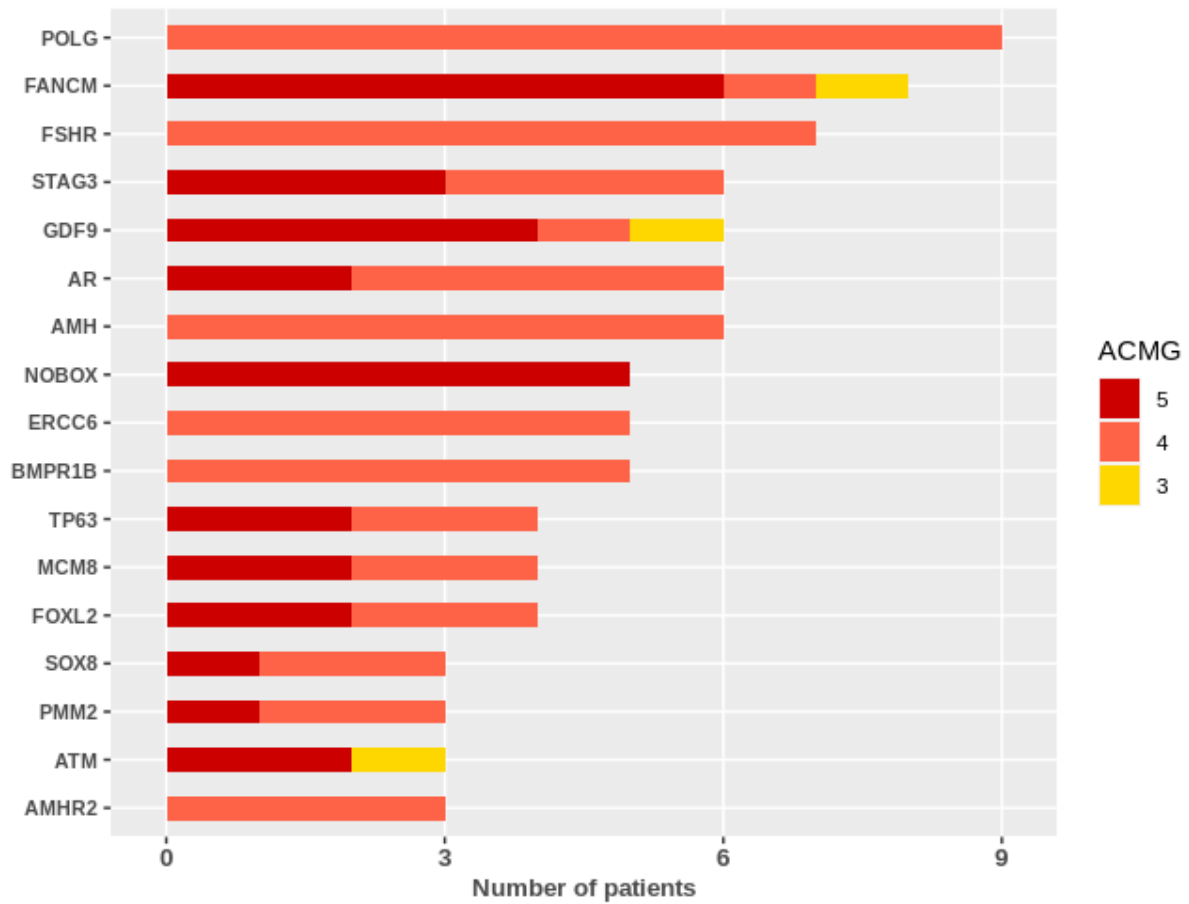

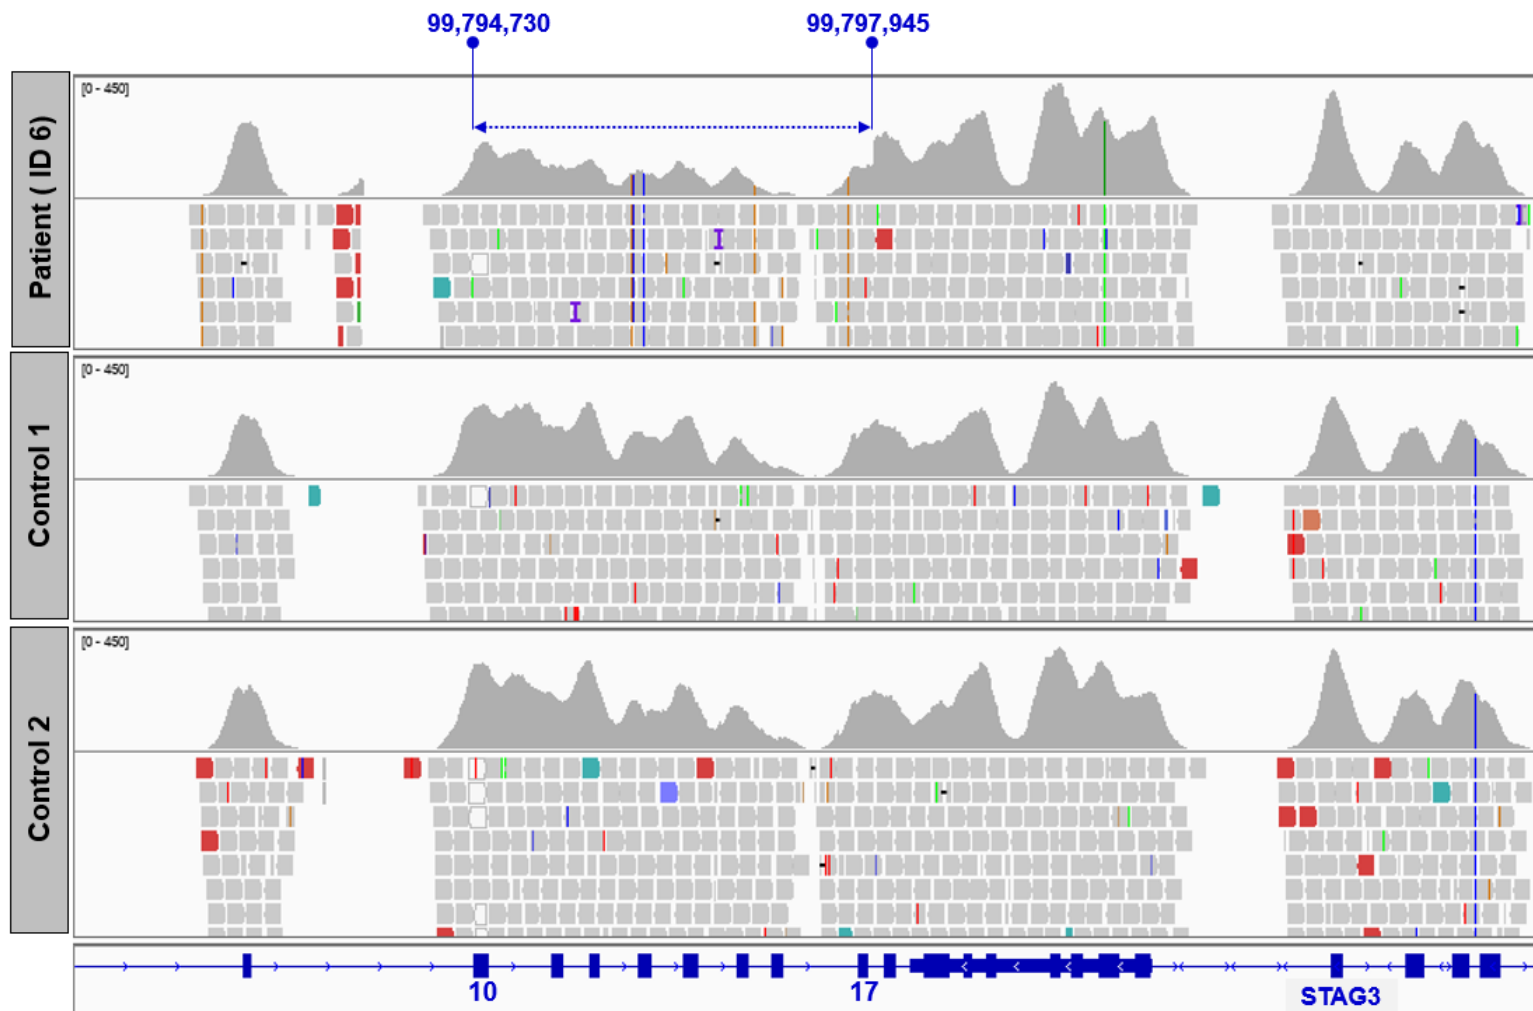

**Figure S3: intragenic deletion of STAG3.** Targeted-NGS data is visualized with IGV (*integrative genomics viewer*) centered on STAG3.

The patient (ID 6) has an intragenic deletion of STAG3 detected by an in-house pipeline based on coverage, to detect Copy Number Variation (CNV). The deletion has a size of 3215 pb (3,2Kbp) (Coordinates according to hg 19: 99,794,730-99,797,945) and extends from exon 10 to exon 17 of STAG3

## Supplemental Tables

(Tables S1, S6 and S7 are larger tables added as separate Excel files)

**Table S2: Clinical characteristics of the cohort of patients with POI**

| <b>Age at diagnosis (Years)</b>        | <b>N</b>        | <b>%</b>     |
|----------------------------------------|-----------------|--------------|
| Mean age                               | 25,54[12-40]    |              |
| <b>Ethnicity</b>                       |                 |              |
| European                               | 232             | 61,9 %       |
| North- African                         | 63              | 16,8 %       |
| Finnish                                | 23              | 6,1 %        |
| African                                | 21              | 5,6 %        |
| Asian                                  | 9               | 2,4 %        |
| Turkish                                | 17              | 4,5 %        |
| Middle East                            | 3               | 0,8 %        |
| Mixed                                  | 7               | 1,9 %        |
| <b>Initial clinical presentation</b>   |                 |              |
| Isolated POI                           | 363             | 96,8%        |
| Syndromic POI                          | 12              | 3,2%         |
| <b>Menses</b>                          |                 |              |
| Primary Amenorrhea (PA)                | 93              | 24,8%        |
| Secondary Amenorrhea (SA)              | 245             | 65,3%        |
| Spaniomenorrhea (SP)                   | 37              | 9,9%         |
| <b>Pregnancy before POI (SA or SP)</b> |                 |              |
| <b>Yes spontaneously</b>               | <b>81</b>       | <b>21,6%</b> |
| 1 pregnancy                            | 46              | 12,3%        |
| 2 pregnancies                          | 28              | 7,5%         |
| 3 pregnancies                          | 5               | 1,3%         |
| 4 pregnancies                          | 2               | 0,5%         |
| <b>Yes with IVF</b>                    | <b>5</b>        | <b>1,3%</b>  |
| 1 pregnancy                            | 4               | 1,1%         |
| 2 pregnancies                          | 1               | 0,2%         |
| <b>No</b>                              | <b>279</b>      | <b>74,4%</b> |
| Unkown                                 | 10              | 2,7%         |
| <b>Hormonal Assays</b>                 |                 |              |
| FSH (IU/l)                             | 76,5[25-244]    |              |
| LH (IU/l)                              | 37,34 [4,6-143] |              |
| Estradiol (IU/l)                       | 48,24[0- 430]   |              |
| AMH (ng/l)                             | 0,31[0-8,3]     |              |



**Table S3: Associated clinical features in patients with syndromic POI**

| ID  | Ethnicity | Age | Menses | Phenotype                                                                 | Gene          | Variant(s)                                                             | Status   | Known syndrome                              |
|-----|-----------|-----|--------|---------------------------------------------------------------------------|---------------|------------------------------------------------------------------------|----------|---------------------------------------------|
| 92  | European  | 27  | SP     | Blepharophimosis, epicanthus inversus, and ptosis                         | <b>FOXL2</b>  | NM_023067.4:c.655C>T : p.Gln219Ter                                     | Het      | <b>BPES</b>                                 |
| 242 | European  | 34  | SA     | Blepharophimosis, epicanthus inversus, and ptosis                         | <b>FOXL2</b>  | NM_023067.4:c.196G>A : p.Ala66Thr                                      | Het      | <b>BPES</b>                                 |
| 324 | European  | 28  | SP     | Blepharophimosis, epicanthus inversus, and ptosis                         | <b>FOXL2</b>  | NM_023067.4:c.576del : p.Lys193SerfsTer78                              | Het      | <b>BPES</b>                                 |
| 175 | European  | 27  | SA     | Hypoparathyroidism                                                        | <b>AIRE</b>   | NM_000383.4:c.769C>T : p.Arg257Ter & c.967_979del : p.Leu323SerfsTer51 | Comp Het | <b>APECED</b>                               |
| 272 | European  | 13  | PA     | Mild Intellectual disability, Sensorineural hearing loss, hyperthyroidism | <b>RCBTB1</b> | NM_018191.4:c.1271T>G :p.Phe424Cys & c.962C>T : p.Pro321Leu            | Comp Het | <b>Syndromic retinal dystrophy</b>          |
| 182 | African   | 27  | SA     | Marinesco-Sjogren syndrome                                                | <b>SIL1</b>   | NM_022464.5 :c.1249C>T : p.Gln417Ter                                   | Hom      | <b>Marinesco-Sjogren syndrome</b>           |
| 315 | Turkish   | 14  | PA     | Intra uterine growth retardation (IUGR), Hypothyroidism, pilomatricomas   | <b>MCM8</b>   | NM_032485.6 : c.925C>T:p.Arg309Ter                                     | Hom      | <b>IUGR, Hypothyroidism, pilomatricomas</b> |
| 104 | European  | 16  | PA     | Single kidney, Haschimoto's thyroiditis, Ptosis, Scoliosis                | <b>NI</b>     | -                                                                      | -        | -                                           |
| 115 | European  | 13  | PA     | Horseshoe kidney epilepsy                                                 | <b>NI</b>     | -                                                                      | -        | -                                           |
| 139 | European  | 18  | PA     | Keratoconus                                                               | <b>NI</b>     | -                                                                      | -        | -                                           |
| 235 | European  | 12  | PA     | Marfanoid habitus , scoliosis, hyperlaxity                                | <b>NI</b>     | -                                                                      | -        | -                                           |

PA: Primary Amenorrhea; SA: Secondary Amenorrhea; SP: Spaniomenorrhea. Age: age at diagnosis. NI: Not identified. BPES: Blepharophimosis, epicanthus inversus, and ptosis syndrome; APECED: Autoimmune PolyEndocrinopathy Candidiasis Ectodermal Dystrophy

**Table S4: Diagnostic performance according to patient's ethnicity**

|                      | <b>Positive</b>    | <b>Carrier</b>   | <b>VUS</b>        | <b>Negative</b>    | <b>Total</b> |
|----------------------|--------------------|------------------|-------------------|--------------------|--------------|
| <b>European</b>      | 61 (26,3%)         | 15 (6,5%)        | 44(19%)           | 112 (48.2%)        | <b>232</b>   |
| <b>North African</b> | 16                 | 3                | 21                | 23                 | <b>63</b>    |
| <b>Finnish</b>       | 11                 | 1                | 1                 | 10                 | <b>23</b>    |
| <b>African</b>       | 6                  | 3                | 4                 | 8                  | <b>21</b>    |
| <b>Asian</b>         | 4                  | 1                | 3                 | 1                  | <b>9</b>     |
| <b>Turkish</b>       | 8                  | 1                | 5                 | 3                  | <b>17</b>    |
| <b>Midle East</b>    | 2                  | 0                | 0                 | 1                  | <b>3</b>     |
| <b>Mixed</b>         | 2                  | 1                | 2                 | 2                  | <b>7</b>     |
| <b>Total</b>         | <b>110 (29,3%)</b> | <b>25 (6,7%)</b> | <b>80 (21,3%)</b> | <b>160 (41,7%)</b> | <b>375</b>   |

Vus: variant of unknown significance

**Table S5: Classification of the variants detected in the cohort of patients with POI**

|                                | <b>N</b>   | <b>%</b>    |
|--------------------------------|------------|-------------|
| <b>ACMG Classification</b>     |            |             |
| Pathogenic                     | 51         | 23,6%       |
| Likely Pathogenic              | 60         | 27,8%       |
| Unkown significance            | 105        | 48,6%       |
| <b>Haplotype</b>               |            |             |
| Heterozygous                   | 144        | 66,7%       |
| Homozygous                     | 27         | 12,5%       |
| Compound Heterozygous          | 24         | 11,1%       |
| Presumed compound heterozygous | 21         | 9,7%        |
| <b>Type of variant</b>         |            |             |
| Missense                       | 159        | 73,6%       |
| Frameshift                     | 23         | 10,7%       |
| Stopgain                       | 24         | 11,1%       |
| Inframe deletion               | 6          | 2,8%        |
| Splice                         | 3          | 1,4%        |
| Start lost                     | 1          | 0,4%        |
| <b>Total</b>                   | <b>216</b> | <b>100%</b> |

**Table S8: Quantification of chromosomal breaks in patients with POI and molecular defects in novel DNA repair -genes**

|                   | Gene                  | Genotype | Aberrant metaphases |              |              | Breaks/ metaphase |               |                | Radial figures |              |                    |
|-------------------|-----------------------|----------|---------------------|--------------|--------------|-------------------|---------------|----------------|----------------|--------------|--------------------|
|                   |                       |          | Untreated           | MMC (150 nM) | MMC (300 nM) | Untreated         | MMC (150 nM)  | MMC (300 nM)   | Untreated      | MMC (150 nM) | MMC (300 nM)       |
| <b>Control 1</b>  | <b>WT</b>             | WT       | 0/50 (0%)           | 1/50 (2%)    | 1/50 (2%)    | 0                 | 1/50 (0,02)   | 7/50 (0,14)    | 0/50 (0%)      | 0/50 (0%)    | 0/50 (0%)          |
| <b>Patient 1*</b> | <b>BRCA2-R2842C</b>   | Hom      | 1/50 (2%)           | 5/50 (10%)   | 9/50 (18%)   | 1/50 (0,02)       | 7/50 (0,14)   | 19/50 (0,38)   | 0/50 (0%)      | 2/50 (4%)    | 2/50 (4%)          |
| <b>Mother*</b>    | <b>BRCA2-R2842C</b>   | Het      | 0/50 (0%)           | 3/50 (6%)    | 2/50 (4%)    | 0                 | 5/50 (0,1)    | 10/50 (0,2)    | 0/50 (0%)      | 2/50 (4%)    | 1/50 (2%)          |
| <b>Patient 2</b>  | <b>HELQ</b>           | Hom      | 3/50 (6%)           | 23/50 (46%)  | 41/50 (82%)  | 4/50 (0,08)       | 64/50 (1,28)  | 199/50 (3,98)  | 1/50 (2%)      | 8/50 (16%)   | 26/50 (52%)        |
| <b>Mother</b>     | <b>HELQ</b>           | Het      | 1/50 (2%)           | 3/50 (6%)    | 28/50 (56%)  | 3/50 (0,06)       | 8/50 (0,16)   | 61/50 (1,22)   | 0/50 (0%)      | 2/50 (4%)    | 4/50 (8%)          |
| <b>Patient 3</b>  | <b>HROB</b>           | Hom      | 5/50 (10%)          | 43/50 (86%)  | 19/19 (100%) | 6/50 (0,12)       | 190/50 (3,8)  | 309/19 (16,26) | 0/50 (0%)      | numerous     | extremely numerous |
| <b>Patient 4</b>  | <b>SWI5</b>           | Hom      | 0/50 (0%)           | 19/50 (38%)  | 45/50 (90%)  | 0                 | 40/50 (0,8)   | 450/50 (9)     | 0/50           | 4/50 (8%)    | 49/50 (98%)        |
| <b>Patient 5</b>  | <b>Fanconi anemia</b> | Hom      | 4/50 (8%)           | 48/50 (96%)  | 30/30 (100%) | 4/50 (0,08)       | 437/50 (8,74) | >30            | 0/50 (0%)      | numerous     | extremely numerous |

WT: wild type, Hom: Homozygous, Het : heterozygous.\* Previous reported patient and her mother with the hypomorphic variant of BRCA2 (R2842C)<sup>3</sup>. Note that the patient with homozygous pathogenic variants of HROB have the highest chromosomal breaks (radial figures and breaks /metaphase) closed to what is observed in Fanconi anemia cells.

**Table S9: Patients initially presenting as isolated POI with Pathogenic or Likely Pathogenic variants in genes causing syndromic POI**

| ID   | Ethnicity     | Menses (ages) | Gene    | Variant                                   | Status        | ACMG | Pathway      | Related syndrome and associated symptoms                                                                                                        |
|------|---------------|---------------|---------|-------------------------------------------|---------------|------|--------------|-------------------------------------------------------------------------------------------------------------------------------------------------|
| 24   | European      | SA (21)       | GALT    | NM_000155.4 :c.563A>G:p.Gln188Arg         | Hom           | 5    | Metabolism   | Galactosemia: cataract, mild intellectual disability, feeding difficulties, poor weight gain and growth, lethargy, and jaundice.                |
| 9*   | European      | SA (39)       | POLG    | NM_001126131.2:c.2528A>G:p.Gln843Arg      | Het           | 4    | Mitochondria | Progressive external ophthalmoplegia, Parkinsonism,                                                                                             |
| 152* | European      | SP (32)       | POLG    | NM_001126131.2:c.2528A>G : p.Gln843Arg    | Het           | 4    | Mitochondria | Progressive external ophthalmoplegia, Parkinsonism,                                                                                             |
| 85   | European      | SA (33)       | POLG    | NM_001126131.2:c.2492A>G : p.Tyr831Cys    | Het           | 4    | Mitochondria | Progressive external ophthalmoplegia, autosomal dominant                                                                                        |
| 133  | European      | SA (38)       | POLG    | NM_001126131.2:c.2492A>G : p.Tyr831Cys    | Het           | 4    | Mitochondria | Progressive external ophthalmoplegia, Parkinsonism,                                                                                             |
|      |               |               | PCCB    | NM_000532.5:c.911C>T: p.Thr304Ile         | Het           | 4    | Metabolism   | Propionicacidemia : poor feeding, pancytopenia, dystonia, psychomotor delay, seizures and cardiomyopathy                                        |
| 190  | Finnish       | SA            | POLG    | NM_001126131.2:c.2492A>G : p.Tyr831Cys    | Het           | 4    | Mitochondria | Progressive external ophthalmoplegia, Parkinsonism,                                                                                             |
| 241  | North-African | SA (34)       | POLG    | NM_001126131.2:c.1550G>T : p.Gly517Val    | Het           | 4    | Mitochondria | Progressive external ophthalmoplegia, Parkinsonism,                                                                                             |
| 278  | European      | SA (34)       | POLG    | NM_001126131.2:c.1550G>T:p.Gly517Val      | Het           | 4    | Mitochondria | Progressive external ophthalmoplegia, Parkinsonism,                                                                                             |
| 52   | European      | SA (29)       | PMM2    | NM_000303.3:c.422G>A:p.Arg141His          | Comp Htz      | 5    | Metabolism   | Congenital disorder of glycosylation, type Ia: Intellectual disability, hypotonia, growth retardation and seizures, and multiple organ failure. |
|      |               |               |         | NM_000303.3: c.91T>C :p.Phe31Leu          |               | 4    | Metabolism   |                                                                                                                                                 |
| 300  | North-African | SA (16)       | PMM2    | NM_000303.3:c.95T>G:p.Leu32Arg            | Hom           | 4    | Metabolism   |                                                                                                                                                 |
| 301  | North-African | SA (16)       | PMM2    | NM_000303.3:c.95T>G:p.Leu32Arg            | Hom           | 4    | Metabolism   |                                                                                                                                                 |
| 276  | European      | SA (28)       | PCCB    | NM_000532.5:c.911C>T : p.Thr304Ile        | Pres Comp Htz | 4    | Metabolism   |                                                                                                                                                 |
|      |               |               |         | NM_000532.5: c.1490C>T : p.Ala497Val      |               | 3    | Metabolism   |                                                                                                                                                 |
| 186  | Finnish       | SA            | LMNA    | NM_170707.4:c.1256G>T : p.Arg419Leu       | Het           | 4    | Metabolism   | Cardiomyopathy, dilated, 1A; Hutchinson-Gilford progeria                                                                                        |
| 43   | Turkish       | PA            | CYP19A1 | NM_000103.4:c.568dupC:p.Leu190Profs Ter11 | Hom           | 5    | Metabolism   | Aromatase deficiency syndrome : pseudohermaphroditism and virilization in women; and tall stature, osteoporosis and obesity in men              |
| 44   | Turkish       | PA            | CYP19A1 | NM_000103.4:c.568dupC:p.Leu190Profs Ter11 | Hom           | 5    | Metabolism   |                                                                                                                                                 |
| 130  | European      | SA (20)       | TWINK   | NM_021830.5:c.904C>T:p.Arg302Trp          | Het           | 4    | Mitochondria | Progressive external ophthalmoplegia with mitochondrial DNA deletions, autosomal dominant, Perrault syndrome.                                   |

|       |               |         |              |                                                   |               |          |                      |                                                                                                                                                  |
|-------|---------------|---------|--------------|---------------------------------------------------|---------------|----------|----------------------|--------------------------------------------------------------------------------------------------------------------------------------------------|
|       |               |         | FANCM        | NM_020937.4:c.5791C>T : p.Arg1931Ter              | Het           | 5        | DNA repair & Meiosis | Breast-ovarian cancer, familial,Fanconi Anemia                                                                                                   |
| 247   | North-African | SP (23) | WT1          | NM_024426:c.299C>G:p.Ala100Gly                    | Het           | 4        | Follicular growth    | Denys-Drash syndrome,Frasier syndrome: Disorder of Sex developement, Nephrotic syndormic, nephroblastoma.                                        |
| 255   | North-African | SA (24) | WT1          | NM_024426: c.299C>G:p.Ala100Gly                   | Het           | 4        | Follicular growth    |                                                                                                                                                  |
| 140   | European      | PA      | BMPR1A       | NM_004329.3:c.1327C>T : p.Arg443Cys               | Het           | 4        | Follicular growth    | Hereditary mixed polyposis syndrome                                                                                                              |
| 112   | Turkish       | SA (14) | <b>CAV1</b>  | <b>NM_001172895.1:c.1A&gt;G: p.Met1Val</b>        | <b>Het</b>    | <b>5</b> | Follicular growth    | Pulmonary Arterial hypertension: Lipodystrophy, familial partial                                                                                 |
| 163   | European      | SA (21) | <b>BMPR2</b> | <b>NM_001204.7:c.1967T&gt;C : p.Leu656Ser</b>     | <b>Het</b>    | <b>4</b> | Follicular growth    | Pulmonary Arterial hypertension                                                                                                                  |
| 275   | European      | PA      | <b>BMPR2</b> | <b>NM_001204.7:c.1790G&gt;A : p.Arg597Gln</b>     | Het           | 4        | Follicular growth    | Pulmonary Arterial hypertension                                                                                                                  |
|       |               |         | <b>AMH</b>   | NM_000479.5:c.35T>G :p.Val12Gly                   | Het           | 4        | Follicular growth    |                                                                                                                                                  |
| 76    | Middle East   | SA (19) | <b>FOXL2</b> | <b>NM_023067.4:c.1049A&gt;T : p.Gln350Leu</b>     | <b>Het</b>    | <b>4</b> | Follicular growth    | BPES: Blepharophimosis, epicanthus inversus, and ptosis ,POI                                                                                     |
| 198   | Finnish       | PA      | <b>TP63</b>  | <b>NM_003722.5:c.191+2T&gt;G:p.?</b>              | <b>Het</b>    | <b>5</b> | DNA repair & Meiosis | Ectrodactyly, ectodermal dysplasia, cleft lip or palate syndrome                                                                                 |
| 224   | African       | PA      | TP63         | NM_003722.5:c.674T>C:p.Ile225Thr                  | Het           | 4        | DNA repair & Meiosis |                                                                                                                                                  |
|       |               |         | <b>BLM</b>   | <b>NM_000057.4:c.772_773delCT:p.Leu258GluSer7</b> | <b>Het</b>    | <b>5</b> | DNA repair & Meiosis | Bloom syndrome : pre- and postnatal growth deficiency, a telangiectatic erythematous rash; predisposition to early onset cancer                  |
| 262   | North-African | SA (27) | TP63         | NM_003722:c.1697C>T:p.Thr566Met                   | Het           | 4        | DNA repair & Meiosis | Ectrodactyly, ectodermal dysplasia, cleft lip or palate                                                                                          |
| 336   | European      | SA (38) | TP63         | NM_003722:c.640A>G :p.Lys214Glu                   | Het           | 4        | DNA repair & Meiosis | Ectrodactyly, ectodermal dysplasia, cleft lip or palate                                                                                          |
| 318** | Turkish       | PA      | BRCA2        | NM_000059.4:c.8524C>T :p.Arg2842Cys               | Hom           | 4        | DNA repair & Meiosis | Breast-ovarian cancer, familial / Fanconi Anemia                                                                                                 |
| 280   | North-African | PA      | BRCA2        | NM_000059.4:c.7234_7235insG : p.Thr2412SerfsTer2  | Pres Comp Htz | 5        | DNA repair & Meiosis | Breast-ovarian cancer, familial / Fanconi Anemia                                                                                                 |
|       |               |         |              | NM_000059.4: c.9364G>A:p.A3122T                   |               | 3        | DNA repair & Meiosis | Breast-ovarian cancer, familial / Fanconi Anemia                                                                                                 |
| 282   | European      | SA (15) | ATM          | NM_000051.4:c.8494C>T : p.Arg2832Cys              | Pres Comp Htz | 5        | DNA repair & Meiosis | Ataxia Telangiectasia syndrome : Progressive cerebellar ataxia, telangiectasia, increased susceptibility to infections and higher risk of cancer |
|       |               |         |              | NM_000051.4: c.6998C>A : p.Thr2333Lys             |               | 3        | DNA repair & Meiosis |                                                                                                                                                  |

PA: Primary amenorrhea; SA: secondary amenorrhea; Novel variants are in bold. Hom: homozygous; Het: heterozygous; Comp Het: Compound heterozygous; Pres Comp Het: Presumed compound heterozygous (parents not available); ACMG: Classification of variant according to American College of Medical Genetics and Genomics; P: Pathogenic, LP, Likely pathogenic. \*Patients 9 and152 are sisters; Patients 300 and 301 are sisters; patients 247 and 255 are sisters; patients 43 and 44 are sisters. \*\* previously described [3]

**Table S10: Patients with Pathogenic or Likely Pathogenic variants in more than one POI gene**

| ID  | Ethnicity     | Menses  | Anomalie                                                | ACMG | Status         | Pathway              |
|-----|---------------|---------|---------------------------------------------------------|------|----------------|----------------------|
| 130 | European      | SA (20) | <b>TWNK(NM_021830.5) : c.904C&gt;T : p.Arg302Trp</b>    | 4    | Het            | Mitochondria         |
|     |               |         | FANCM(NM_020937.4) : c.5791C>T : p.Arg1931Ter           | 5    | Het            | DNA repair & Meiosis |
| 133 | European      | SA (38) | <b>POLG(NM_001126131.2): c.2492A&gt;G: p.Tyr831Cys</b>  | 4    | Het            | Mitochondria         |
|     |               |         | PCCB (NM_000532.5) : c.911C>T : p.Thr304Ile             | 4    | Het            | Metabolism           |
| 138 | Asian         | SA (36) | <b>HFM1(NM_001017975.6): c.3470G&gt;A: p.Cys1157Tyr</b> | 5    | Pres Comp Het* | DNA repair & Meiosis |
|     |               |         | <b>HFM1(NM_001017975.6): c.905G&gt;A: p.Cys302Tyr</b>   | 3    |                |                      |
|     |               |         | PCCA(NM_000282.4) : c.1168C>T : p.Arg390Cys             | 4    | Het            | Metabolism           |
| 167 | European      | SA (18) | <b>FANCM(NM_020937.4) : c.5101C&gt;T : p.Gln1701Ter</b> | 5    | Pres Comp Het* | DNA repair & Meiosis |
|     |               |         | <b>FANCM(NM_020937.4): c.1528G&gt;A: p.Gly510Ser</b>    | 3    |                |                      |
|     |               |         | ATM (NM_000051.4): c.6596_6597delCT : p.Ser2199Ter      | 5    | Het            | DNA repair & Meiosis |
| 224 | African       | PA      | <b>TP63(NM_003722.5) : c.674T&gt;C: p.Ile225Thr</b>     | 4    | Het            | DNA repair & Meiosis |
|     |               |         | BLM (NM_000057.4) : c.772_773delCT : p.Leu258GluTer7    | 5    | Het            | DNA repair & Meiosis |
| 232 | Mixed         | SP (30) | <b>AR(NM_000044.6) : c.2395C&gt;G : p.Gln799Glu</b>     | 4    | Het            | Follicular growth    |
|     |               |         | FANCA (NM_000135.4): c.3558dupG: p.Arg1187GluTer28      | 5    | Het            | DNA repair & Meiosis |
| 268 | North-African | SA (35) | <b>BMPR1B(NM_001256793): c.1165A&gt;G: p.Ser389Gly</b>  | 4    | Het            | Follicular growth    |
|     |               |         | PCCB (NM_000532): c.646A>G: p.Met216Val                 | 4    | Het            | Metabolism           |
| 275 | European      | PA      | <b>BMPR2(NM_001204.7):c.1790G&gt;A : p.Arg597Gln</b>    | 4    | Het            | Follicular growth    |
|     |               |         | AMH(NM_000479.5):c.35T>G :p.Val12Gly                    | 4    | Het            | Follicular growth    |

PA: Primary amenorrhea; SA: secondary amenorrhea; Het: heterozygous; Pres Comp Het: Presumed compound heterozygous (Parents not available); ACMG: Classification of variants according to the American College of Medical Genetics and Genomics; \* parents not available. In bold the gene variant sufficient to cause POI
